# Supplementary material
Source: Springer Nature journal article supplement (https://mijn.bsl.nl/resource/supplementary/13047_2010_132_MOESM5_ESM.pdf/7109980)
Supplement: MOESM5 [file 7109980]

Database search  
6763 Unique records identified  
5560 Medline  
421 Embase  
782 CINAHL

Titles and abstracts screened with the following question: "Does the article appear to discuss prevalence of HV or bunions?"

6386 Excluded based on the following criteria:  
No relation to HV, foot deformities, or prevalence  
Descriptions of operative or non-operative interventions  
Studies relating to specific disease groups (RhA, leprosy, diabetes, neuromuscular disorders)  
Discussions of traumatic injury to the first toe joint  
Studies evaluating reliability or validity of measurement scales

377 retrieved for detailed evaluation  
295 Full-text  
82 Abstract only

Reference list searches  
211 Records identified  
178 Full-text  
33 Abstract only

588 reviewed against inclusion criteria

506 Excluded  
311 Did not discuss HV prevalence in healthy population  
136 Excluded on the basis of study design (literature reviews, case studies, clinical opinion)  
45 No specific diagnosis of HV or self-reported bunions  
14 No original quantitative data

4 Unable to source from any library

78 Articles included in the review
